# Supplementary material for: Aerosol assisted chemical vapour deposition of a ZrO2–TiO2 composite thin film with enhanced photocatalytic activity
Source: Royal Society of Chemistry journal article supplement (doi:10.1039/c5ra12340b), 2015-01-01
Supplement: c5ra12340b1.pdf [file c5ra12340b1.pdf]

|                                               | hkl | Bragg Angle $2\theta/^\circ$ | Peak Width ' $\beta$ '/ $^\circ$ | Diameter/nm | Average diameter / nm |
|-----------------------------------------------|-----|------------------------------|----------------------------------|-------------|-----------------------|
| ZrO <sub>2</sub>                              | 111 | 30.27                        | 1.118                            | 7           | 8                     |
|                                               | 200 | 35.14                        | 0.893                            | 9           |                       |
|                                               | 220 | 50.50                        | 1.445                            | 6           |                       |
| TiO <sub>2</sub>                              | 101 | 25.29                        | 0.274                            | 30          | 28                    |
|                                               | 200 | 48.03                        | 0.317                            | 27          |                       |
|                                               | 211 | 55.06                        | 0.335                            | 27          |                       |
| ZrO <sub>2</sub> - TiO <sub>2</sub> composite | 101 | 24.99                        | 0.440                            | 19          | 16                    |
|                                               | 111 | 30.89                        | 0.623                            | 13          |                       |

**Table 1:** Shows the calculated crystallite size in the ZrO<sub>2</sub>, TiO<sub>2</sub> and ZrO<sub>2</sub> – TiO<sub>2</sub> composite films grown via AACVD.

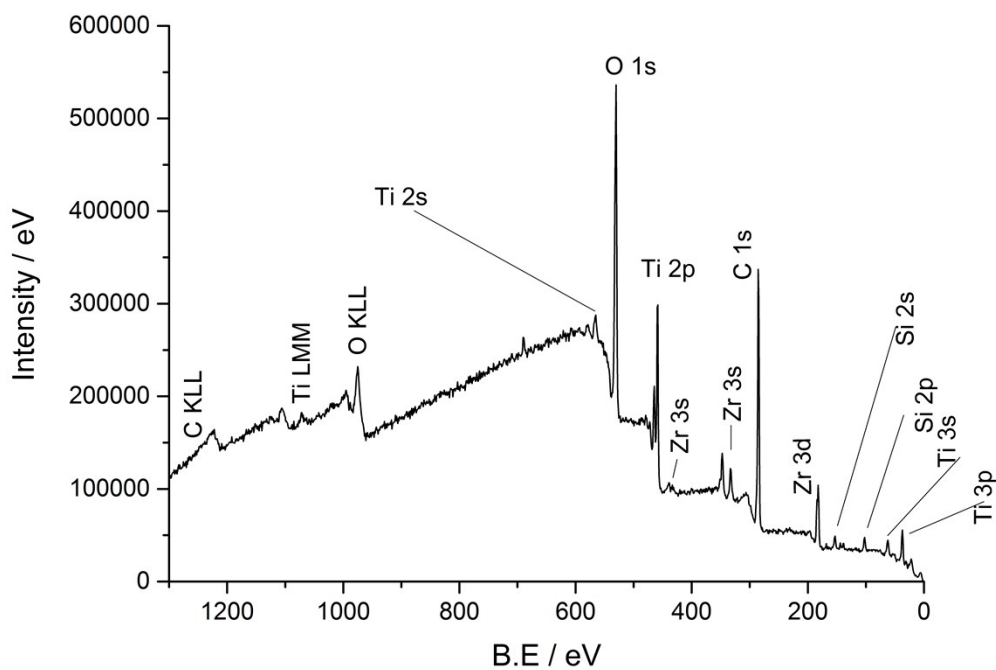

**Figure 1:** The survey scan for the ZrO<sub>2</sub> – TiO<sub>2</sub> film grown via AACVD. The surface of the film was free of all contaminants other than Si (from silicon grease).

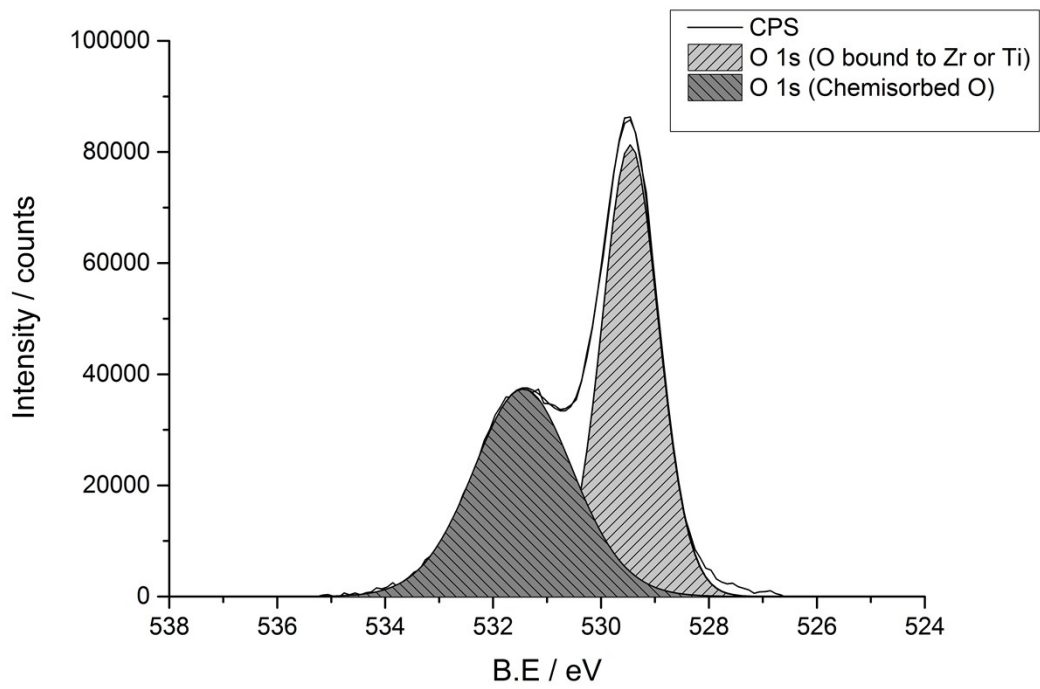

**Figure 2: The O 1s XPS spectrum for the ZrO – TiO<sub>2</sub> composite film. The raw data was deconvoluted to give two oxygen environments corresponding to O bound to Zr or Ti as well as chemisorbed oxygen.**

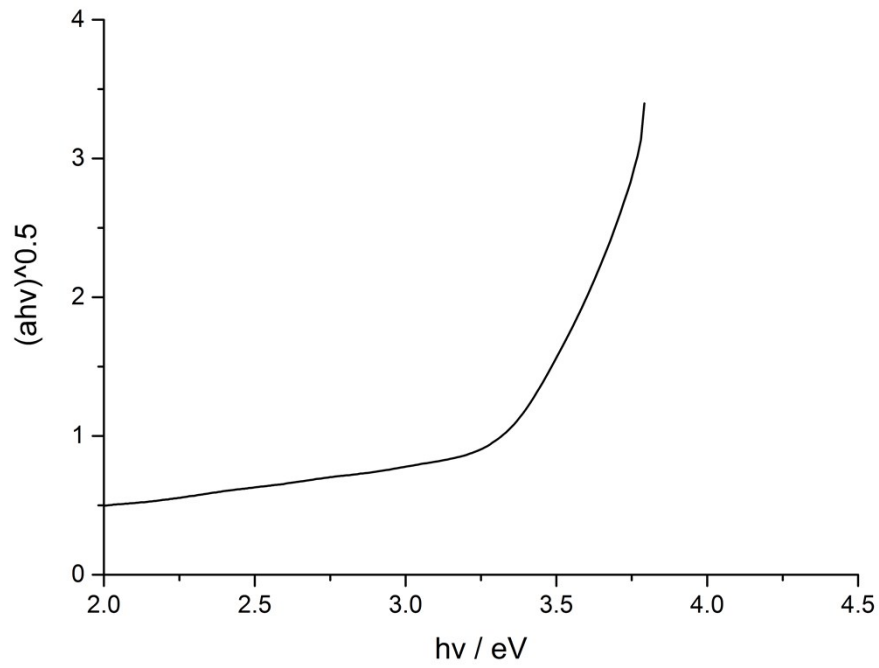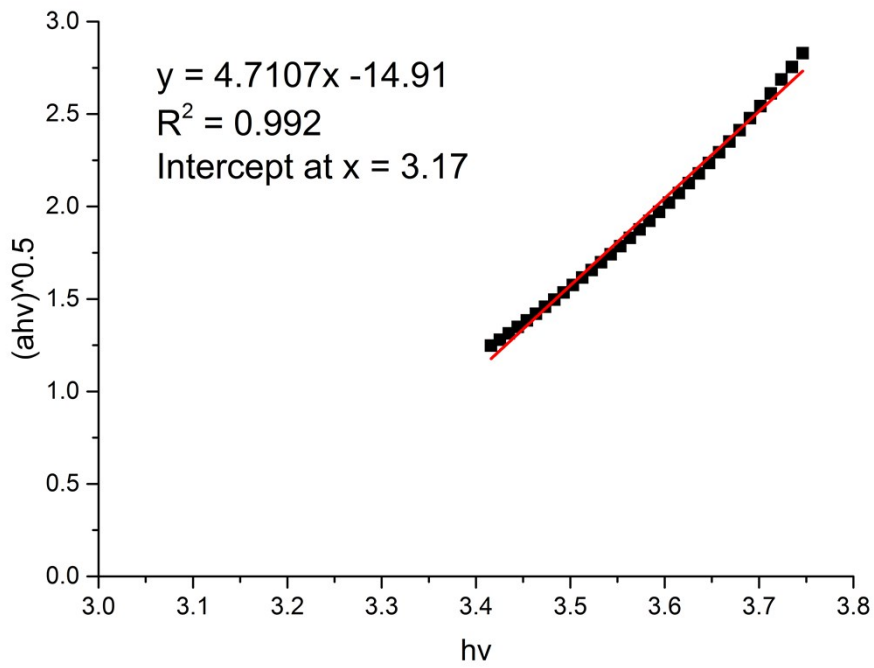

**Figure 3:** Above) the Tauc plot for the anatase TiO<sub>2</sub> film. Below) linear regression applied to the steepest part of the Tauc plot shows an indirect bandgap of 3.2 eV.

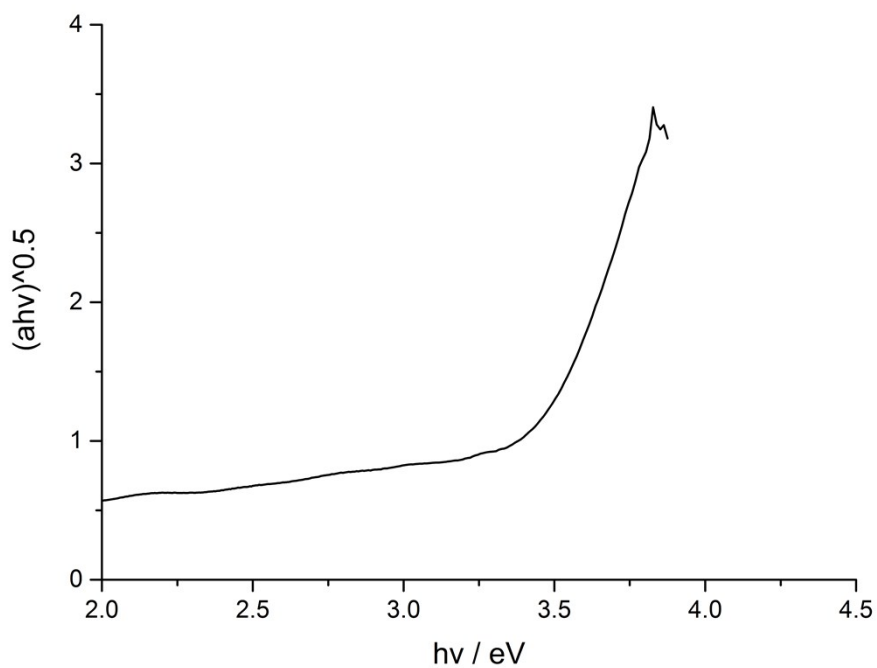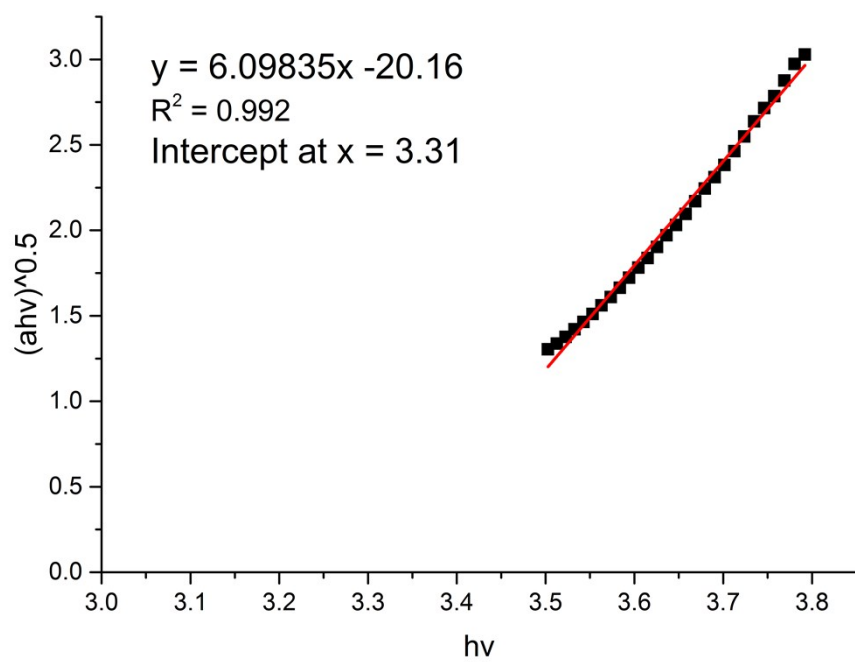

**Figure 4: Above) the Tauc plot for the composite  $ZrO_2 - TiO_2$  film. Below) linear regression applied to the steepest part of the Tauc plot shows an indirect bandgap of 3.3 eV - corresponding to the anatase phase of the film.**

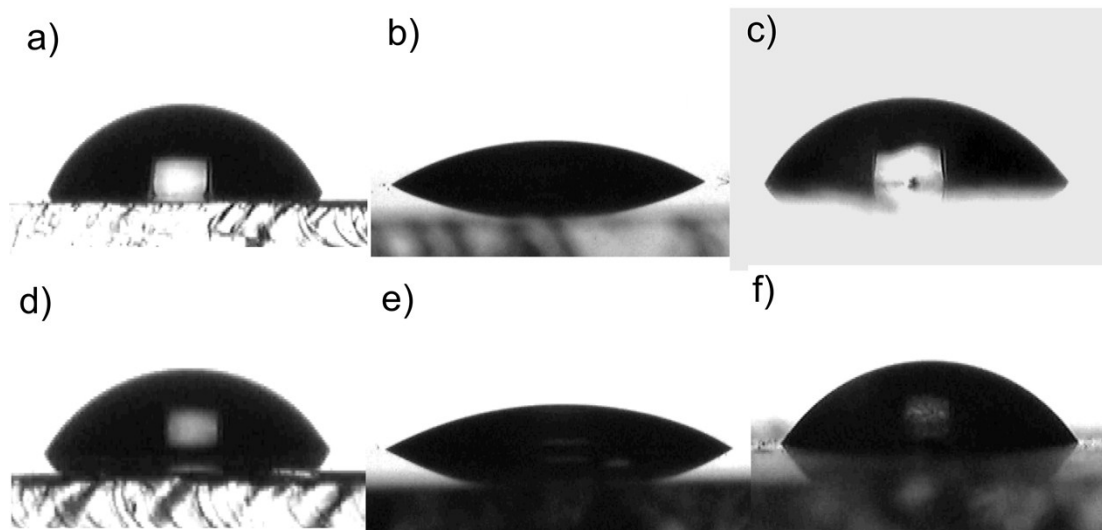

**Figure 5: The water contact angle measurements pre and post irradiation with UVA radiation (flux=  $3.67 \times 10^{14}$  photons per  $\text{cm}^2$  per s) for 16 hours. Pre irradiation a)  $\text{ZrO}_2$ ,  $\text{TiO}_2$  and  $\text{ZrO}_2 - \text{TiO}_2$  composite. Post irradiation d)  $\text{ZrO}_2$  e)  $\text{TiO}_2$  and f)  $\text{ZrO}_2 - \text{TiO}_2$  composite.**
